# Supplementary material for: A transparent, tough self-healing hydrogel based on a dual physically and chemically triple crosslinked network
Source: Royal Society of Chemistry journal article supplement (doi:10.1039/c9tc02697e), 2019-01-01
Supplement: c9tc02697e1.pdf [file c9tc02697e1.pdf]

## Supporting information

### A transparent, tough self-healing hydrogel based on dual physically and chemically triple crosslinked network

Shengping Dai<sup>†</sup>, Shuai Wang<sup>†</sup>, Xu Dong<sup>1</sup>, Xiuzhu Xu<sup>2</sup>, Xiaoting Cao<sup>1</sup>, Xiaoshuang Zhou<sup>1</sup>, Jianing Ding<sup>1,2\*</sup>, Ningyi Yuan<sup>1\*</sup>

<sup>1</sup>Jiangsu Collaborative Innovation Center for Photovoltaic Science and Engineering, Jiangsu Province Cultivation base for State Key Laboratory of Photovoltaic Science and Technology, Changzhou University, Changzhou University, Changzhou 213164, P. R. China.

<sup>2</sup>Micro/Nano Science and Technology Center, Jiangsu University, Zhenjiang, 212013, P. R. China

<sup>†</sup> These authors contributed equally to this work. \* Email: dingjn@ujc.edu.cn; nyuan@cczu.edu.cn.

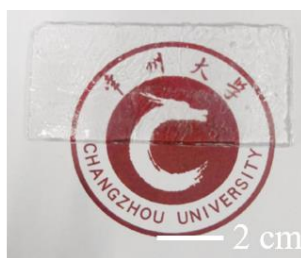

Fig. S1 The transparent film of PVA/B TN hydrogel.

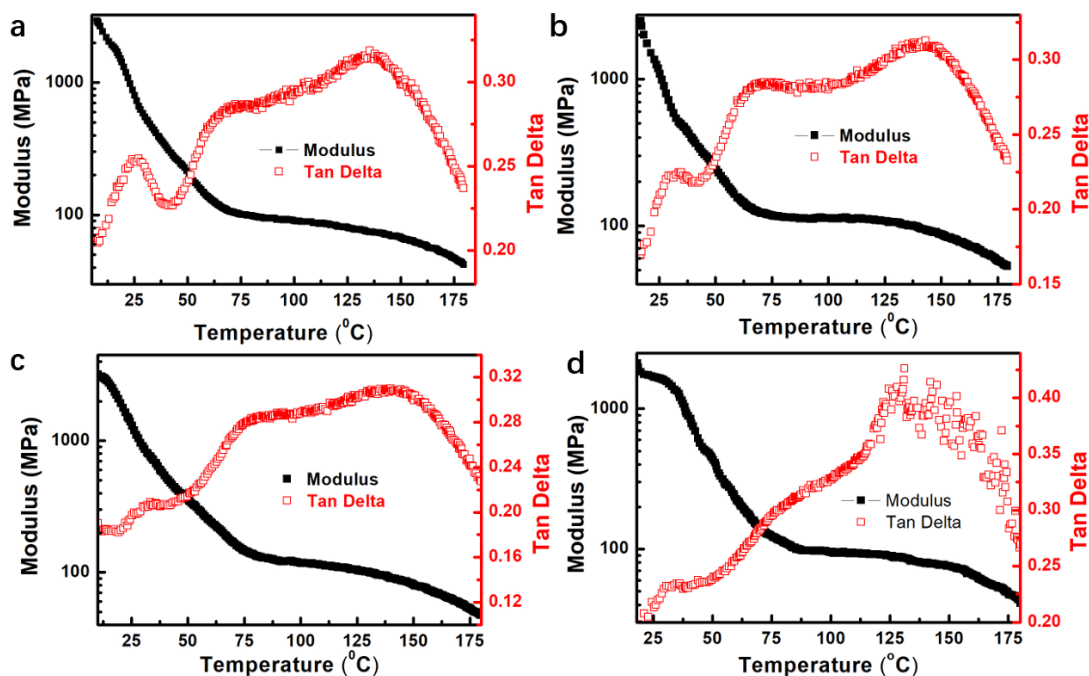

Fig. S2 Temperature dependence of modulus and tan delta for different freeze-thaw cycles hydrogels. (a) 0 cycle, (b) 1 cycle, (c) 2 cycles (d) 3 cycles. All hydrogels were freeze-dried for 24h to the DMA measurement.

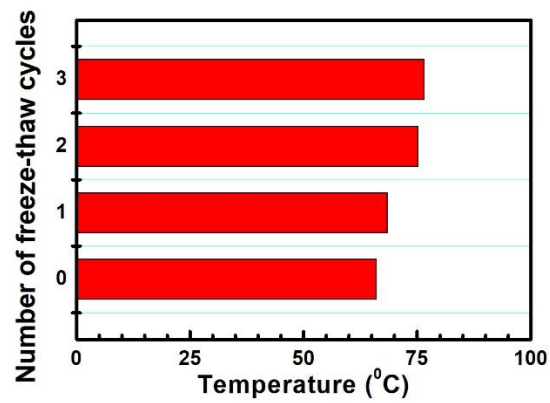

Fig. S3 The glass-transition temperature ( $T_g$ ) of different freeze-thaw cycles hydrogels

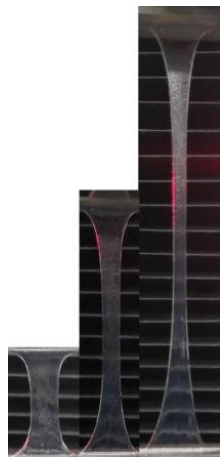

Fig. S4 The tensile strain-stress test was performed on the hydrogel samples.

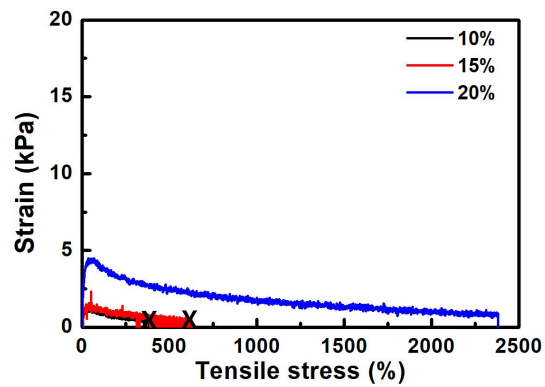

Fig. S5 Tensile stress–strain curves for different PVA mass concentration without freezing/thawing cycles. The “x” in the figure represents unfracture, which was difficult to accurately measure the magnitude of the stress and strain at low mass concentrations (10wt% and 15wt%).

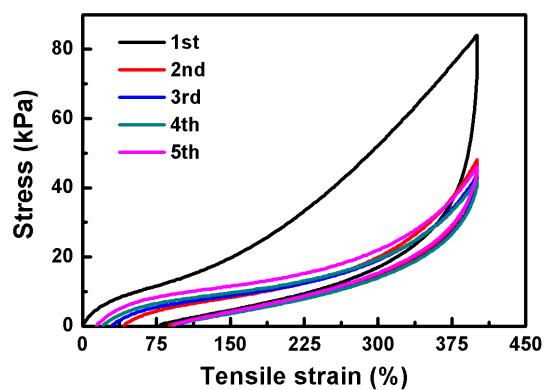

Fig. S6 The PVA/B TN hydrogel cyclic tensile loading-unloading curves for five successive stretching to 400% strain.

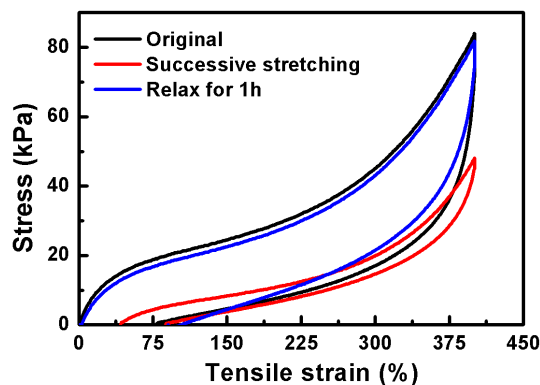

Fig. S7 Cyclic tensile loading-unloading curves at 400% strain with different resting times.

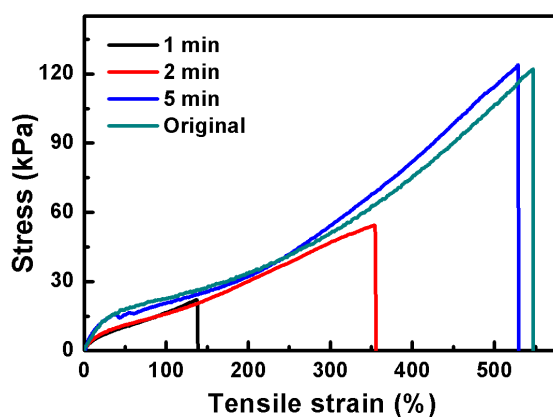

Fig. S8 Tensile stress-strain curves of hydrogels with 20wt% PVA mass concentration after three freeze-thaw cycles at different healing times.

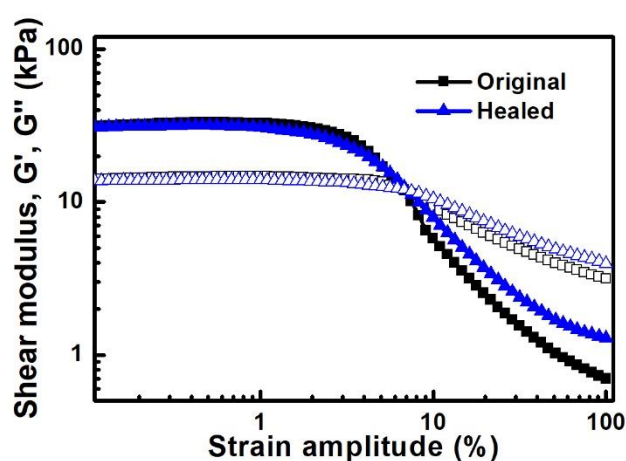

Fig S9.  $G'$  and  $G''$  for the original and healed 3 freeze-thaw cycles hydrogels measured as a function of oscillatory strain amplitude,  $\gamma_0$  ( $\omega = 6.28 \text{ rad s}^{-1}$ ).

Table S2 A review on transparent, tough and self-healing hydrogels (RT: room temperature, -: No figures were given)

| Ref. | Ingredient                                    | transparent | Stretchability/<br>tough | Healing<br>conditions | healing<br>efficiencies | Year         |
|------|-----------------------------------------------|-------------|--------------------------|-----------------------|-------------------------|--------------|
| 1    | PAA/ $\text{Fe}^{3+}$                         | -           | 650%                     | RT/6h                 | 99%                     | 2013         |
| 2    | Catechol/<br>$\text{Mg}^{2+}, \text{Zn}^{2+}$ | -           | 5 MPa                    | RT/24h                | 80%                     | 2016         |
| 3    | PVA-PAM                                       | 92%         | 200 kPa                  | -                     | -                       | 2018         |
| 4    | PDMAEA<br>-Q/PAA                              | 90%         | 4 MPa                    | RT/48h                | -                       | 2019         |
| 5    | PAM/carra<br>geenan                           | -           | 950%                     | 85°C/30min            | -                       | 2019         |
|      | PVA/B                                         | 82%         | 528%/123kPa              | RT/5min               | 98.5%                   | This<br>work |

### References:

- [1] Z. Wei, J. He, T. Liang, H. Oh, J. Athas, Z. Tong, C. Wang, Z. Nie, *Polym. Chem.* 2013,4, 4601-4605.
- [2] J. Li, H. Ejima, N. Yoshie. *ACS Appl. Mater. Interfaces*, 2016, 8, 29, 19047-19053.
- [3] G. Ge, Y. Zhang, J. Shao, W. Wang, W. Si, W. Huang, X. Dong, 2018, 28, 32, 1802576-1802584.
- [4] Z. Lei, P. Wu. *Mater. Horiz.*, 2019,6, 538-545.
- [5] J. Wu, Z. Wu, X. Lu, S. Han, B. Yang, X. Gui, K. Tao, J. Miao, C. Liu. *ACS Appl. Mater. Interfaces* 2019,11, 9405-9414.
